# Supplementary material
Source: publisher figshare collection journal article supplement (https://acs.figshare.com/ndownloader/files/3799531)
Supplement: Supplementary file 1 [file 3799531]

## **Recognition of Dual Targets by Molecular Beacon-Based Sensor: Subtyping of Influenza A Virus**

Chun-Ching Lee<sup>1</sup>, Yu-Chieh Liao<sup>2</sup>, Yu-Hsuan Lai<sup>1</sup>, and Min-Chieh Chuang<sup>1,\*</sup>

<sup>1</sup> Department of Chemistry, Tunghai University, Taichung, Taiwan

<sup>2</sup> Institute of Population Health Science, National Health Research Institutes, Zhunan, Miaoli County, Taiwan

\* To whom correspondence should be addressed. Tel: +886-4-2359-0121 ext. 32218; Fax: +886-4-2359-0426; Email: mcchuang@thu.edu.tw

Table S-1. Oligonucleotides used in this study.

| Designation | Sequence and modification (5'→3')                                           | Notes                                                 |
|-------------|-----------------------------------------------------------------------------|-------------------------------------------------------|
| A2          | CAT CAT CAC TAC AGA GGA GCT ATC<br>ATG ATT                                  | Assistant strand for (1,1)                            |
| A3          | ATC ATC ACTACA GAT GAG CTA TCA<br>TGA TTC                                   | Assistant strand for (2,0)                            |
| A4          | CAT CAT CAC TAC AGA GAG CTA TCA<br>TGA TTC                                  | Assistant strand for (2,1)                            |
| A7          | CCA TCA GGC CAT GAC ATG ATT GCC<br>AGT GC                                   | Assistant strand for H5- and<br>N2-specific sequences |
| A8          | ATC ATC ACT ACA GAT TGG AGC TAT<br>CAT GAT                                  | Assistant strand for (0,0)                            |
| A9          | CCA TCA TCA CTA CAG GGA GCT ATC<br>ATG ATT                                  | Assistant strand for (1,2)                            |
| H           | GCA CTG GCA ATC ATG ATA GCT GGT<br>CTA TCT TTT TGG TGA AGC                  | The target bearing<br>H5-specific sequence            |
| MB1         | FAM-CCG GCA ATG ATT GAT CGT TAC<br>CCA AAT AGT ATG CCG G-Dabcyl             | Molecular beacon 1                                    |
| MB2         | FAM-CCA CAG GGT AAA GAT AGA CCA<br>GCT GCC TGT TCC ATA CCC TGT<br>GG-Dabcyl | Molecular beacon 2                                    |
| N           | TAT GGA ACA GGC TCA TGG CCT GAT<br>GGG GCG A                                | The target bearing<br>N2-specific sequence            |
| TE          | ACT CAA ACG ATC AAT CAT TGC                                                 | Target sequence E                                     |
| TF          | GCA TAC TAT TTG GGT CTA TC                                                  | Target sequence F                                     |
| TG          | AAT GAA TCA TGA TAG CTC CAA ACG<br>ATC AAT CAT T                            | Target sequence G                                     |
| TI          | ATA CTA TTT GGG TAT CTG TAG TGA<br>TGA TGG GGC                              | Target sequence I                                     |
| SH5         | GCA GCG AGT TCC CTA GTA CTG                                                 | Sense primer for H5                                   |
| ASH5        | TGA CCC ATT GGA ACA CAT CCA G                                               | Antisense primer for H5                               |
| SN2         | TTG TGG CAC TTC AGG TAC TTA TG                                              | Sense primer for N2                                   |
| ASN2        | ATA GGC ATG AAG TTG ATA TTC GCC C                                           | Antisense primer for N2                               |

### **Asymmetric Polymerase Chain Reaction (aPCR)**

The sense and antisense primers (Table S-1) for amplification of H5 and N2 genes from the cDNA of A/duck/Taiwan/DV30-2/2005 (H5N2) were designed by the T<sub>m</sub> Calculator of NCBI primer-BLAST. The aPCR product of H5 segment was generated from a 25 µL PCR mixture containing 1X Phusion HF buffer, 200µM dNTP, 1 µM SH5, 0.1 µM ASH5, 1 µg viral genome (cDNA), and 0.5 units of Phusion High-Fidelity DNA polymerase. Reactions were performed with the MJ Mini Thermal Cycler (Bio-Rad, Hercules, CA). The amplification cycles include 1 cycle of 30 sec at 98 °C followed by 50 cycles of 98 °C for 10 sec, 62.2 °C for 20 sec, and 72 °C for 15 sec, and was finally cooled down at 4 °C for 30 sec. For the aPCR of N2 gene, the 25 µL PCR mixture composed of 1X Phusion HF buffer, 200 µM dNTP, 1 µM SN2, 0.2 µM ASN2, 1µg viral genome (cDNA), and 0.5 units of Phusion High-Fidelity DNA polymerase. The amplification cycles include 1 cycle of 30 sec at 98 °C followed by 50 cycles of 98 °C for 10 sec, 60.7 °C for 20 sec, and 72 °C for 15 sec, and was finally cooled down at 4 °C for 30 sec.

### **Viral samples and reverse transcription**

Genuine sample derived from influenza virus particles, the strain A/duck/Taiwan/DV30-2/2005 (H5N2), was kindly supplied by the ID Public Health Lab (led by Professor Chwan-Chuen King) in College of Public Health, National Taiwan University. The Genbank accession number is CY110933 for HA and CY110935 for NA gene. Viral RNA (vRNA) was extracted using QIAamp Viral RNA Mini Kit (Qiagen, Limburg, Netherlands) according to manufacturer's instructions. The extracted RNA were then reverse transcribed to cDNA using an universal primer Uni12, which is complementary to 12 conserved contiguous nucleotides at the 3'-end of influenza vRNA.<sup>1</sup> Prior to reverse transcription, mixture of vRNA, Uni12 primer, and dNTP was heated at 65 °C for 5 min, followed by an incubation on ice for 5 min. Subsequently, cDNA were generated in a solution (20 µL) composed of 5 µL vRNA, 500 µM dNTP, 500 nM Uni12 primer, 10 U Superscript™ III Reverse Transcriptase (Invitrogen, Carlsbad, CA), 10 mM DTT, 2U RNaseOUT™ Recombinant Ribonuclease Inhibitor (Invotrogen) in the first-strand buffer. The solution was subsequently incubated at 50 °C for 1 hr and the reaction was inactivated at 70 °C for 15-min. Eventually the cDNA products were purified with QIAquick PCR Purification Kit (Qiagen).

## Equilibrium analysis

Equilibrium constants for the hybridization between the MB and its target hybrids were evaluated based on the method described below. In a solution containing MB and target DNA (T), there existed at least three distinct states: MB-T hybrid (phase 1, denoted as MB·T), stem-loop folded MB free from the target (phase 2, MB<sub>closed</sub> + T), and random coiled MB free from the target (phase 3, MB<sub>open</sub> + T). The reaction can be presented as:

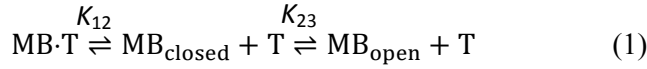

The fluorescence ( $F$ ) obtained from the solution at a given temperature is the sum of the molecular beacons in each of the three states, and can be expressed as:

$$F = \alpha \frac{[\text{MBT}]}{\text{MB}_0} + \beta \frac{[\text{MB}_{\text{closed}}]}{\text{MB}_0} + \gamma \frac{[\text{MB}_{\text{open}}]}{\text{MB}_0} \quad (2)$$

Where  $\alpha$ ,  $\beta$ , and  $\gamma$  are the characteristic fluorescence intensities of the molecular beacon in each state, and MB<sub>0</sub> is the total concentration of molecular beacon ( $= [\text{MBT}] + [\text{MB}_{\text{closed}}] + [\text{MB}_{\text{open}}]$ ). Based on the basic definition of  $K_{12}$  and  $K_{23}$ :

$$K_{23} = \frac{[\text{MB}_{\text{open}}]}{[\text{MB}_{\text{closed}}]} \quad (3)$$

$$K_{12} = \frac{[\text{MB}_{\text{closed}}][\text{T}]}{[\text{MBT}]} \quad (4)$$

When the total concentration of the target,  $T_0$ , is much greater than the total concentration of the molecular beacon, MB<sub>0</sub>,  $T_0$  can be substituted for  $[\text{T}]$ . The fraction of molecular beacons illustrated in eq. 2 can be expressed in terms of  $K_{12}$  and  $K_{23}$ ; furthermore, eq. 1 can be presented as:

$$F = \frac{\alpha T_0 + \beta K_{12} + \gamma K_{12} K_{23}}{T_0 + K_{12} + K_{12} K_{23}} \quad (5)$$

A rearrangement of eq. 5 results in:

$$K_{12} = \frac{(\alpha - F)T_0}{(F - \beta) + (F - \gamma)K_{23}} \quad (6)$$

Also by taking  $T_0 = 0$  (as a circumstance in absence of targets), eq. 5 can be rearranged to

give:

$$K_{23} = \frac{\theta - \beta}{\gamma - \theta} \quad (7)$$

In the evaluation of  $K_{12}$  and  $K_{23}$  based on eq. 6 and 7,  $F$  is the fluorescence intensity as a function of temperature obtained from the thermal denaturation profile. The value of  $\beta$  is the fluorescence of the molecular beacon solution (in absence of targets) acquired at 15 °C. The value of  $\alpha$  and  $\gamma$  is the fluorescence measured at 15 and 85 °C, respectively, in the presence of targets.

### Kinetic analysis

The unfolding kinetics of MB upon hybridization with target DNAs was analyzed:

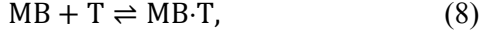

$$\frac{d[\text{MB} \cdot \text{T}]}{dt} = k_1[\text{MB}][\text{T}] - k_2[\text{MB} \cdot \text{T}] \quad (9)$$

where  $k_1$  is the opening rate constant, and  $k_2$  is the closing rate constant of MB upon hybridization. Assuming that fluorescence could be normalized as following,

$$\frac{[\text{MB} \cdot \text{T}]_T}{[\text{MB} \cdot \text{T}]_{eq}} = \frac{F(T) - F_0}{F_{eq} - F_0} = F_n \quad (10)$$

in which  $F_{eq}$  is the fluorescence of the system when  $T \rightarrow \infty$  and  $F_0$  is the initial fluorescence intensity. After solving the above equation and rearranging the formula with normalized fluorescence  $F_n$ , an exponential function can be derived:

$$\frac{1 - F_n}{1 - \rho F_n} = e^{-\omega k_1 t} \quad (11)$$

where  $\rho = ([\text{MB} \cdot \text{T}]_{eq})^2 / \text{MB}_0 \text{T}_0$ ,  $[\text{MB} \cdot \text{T}]_{eq} = (\text{MB}_0 + \text{T}_0 + K_{12} - \omega) / 2$ ,

$\omega = \sqrt{(\text{MB}_0 + \text{T}_0 + K_{12})^2 - 4\text{MB}_0 \text{T}_0}$ , and  $K_{12} = k_2 / k_1$ .

The unfolding rate constant  $k_1$  could be derived by fitting the normalized fluorescence data to an alternative form of equation 11 (after taking natural log of it), resulting in a linear plot with a slope  $k_1$ ,

$$\frac{1}{\omega} \ln \left( \frac{1 - F_n}{1 - \rho F_n} \right) = -k_1 t \quad (12)$$

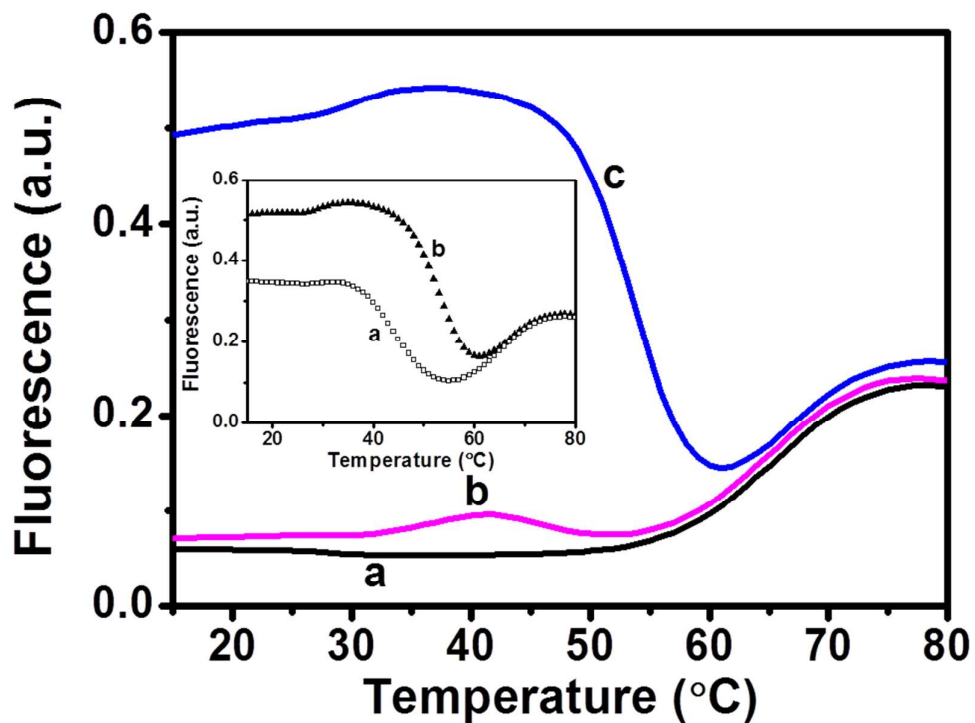

Figure S-1. Thermal denaturation profiles observed as a result of MB1 unfolding in the presence of (a) no target sequence, (b) targets TG and TI, and (c) targets TE and TF. Inset: thermal denaturation profiles of MB1 treated with either target TF (a) or TE (b) alone. Sequences of MB1 and targets are elaborated in Table S-1. The concentrations of MB1 and each target were 0.2 and 1.2  $\mu\text{M}$ , respectively.



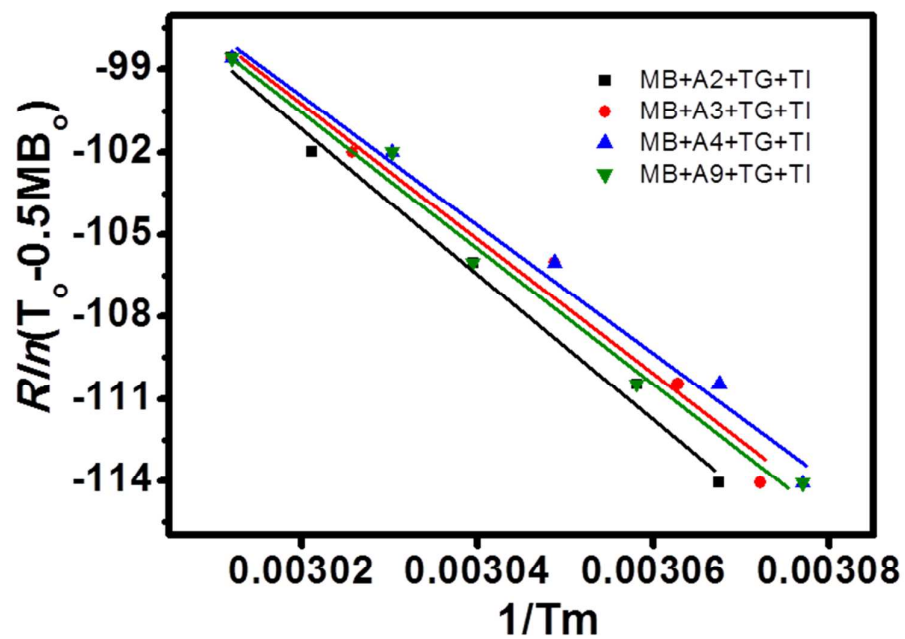

Figure S-2. The relationships between  $R \ln([T_0] - 0.5[MB_0])$  and reciprocal of melting temperature in connection to varied compositions of space nucleotides.

We sought to harness the 18-nt fragment (in H5) and the 26-nt fragment (in N2) as targets to configure the corresponding hairpin and assistant strand. While we have identified the 18-nt H5-specific fragment, the 8th and 9th nucleotide (T and G) are unfortunately exceptional to the H5N2 strains (e.g., A/duck/Taiwan/DV30-2/2005) employed. This rendered us to perform the shorter (16-nt) candidate fragment instead. Also note that a stable duplex construction between the target and the assistant strand was desired towards a successful operation of the scheme, thereby the longest candidate fragment (i.e., the 26-nt) was exerted for N2-specific sequence to allow a pendent overhang, apart from the segment in hybridization with the loop region, for formation of a long duplex between N2 target and assistant strand. We assigned 8-nt fragment (residing in 3'end of the H5-specific sequence) and 9-nt (5'end in the N2-specific sequence) to hybridize with loop and enable 8- and 16-nts, in H5 and N2, respectively, hybridizing with the assistant strand. This design (Figure S-3), nevertheless, was eventually unsuccessful to function in AND gate format, as the assistant strand/H5 duplex was unfavourably formed due to a short number of base pairs in hybridization.

We therefore turned to render the 16-nt H5-specific sequence in hybridization with loop and employ its neighboring fragment (conserved region of the H5 coding gene, with a deoxyadenylate nucleotide in separate from the specific sequence) to hybridize with the assistant strand. Such the design conferred H5-target sufficient length for hybridization with both the loop portion and the assistant strand, obviating the doubt forming thermodynamically unfavorable duplexes. Uniquely we assigned the deoxyadenylate to serve as the unpaired nucleotide to alleviate the stress tightened in the four-way junction. Once the sequence of molecular beacon was compiled in accordance with the consideration illustrated above, one should note that a deoxythymidylate residing at the 17th nt of H5-target (numbered from 5'end) was predicted to de-hybridize with loop (based on the mfold simulation, Figure S-4). In order to exclude the possibility leaving a single-stranded nucleotide in the loop, an assistant strand was designed to refer the deoxythymidylate as one of the space nucleotide to conclude a molecular beacon in response to a 15-nt H5-specific fragment.

In the N2 aspect, a straight-forwarding approach drove us to assign a comparable length (15-nt, numbered from 5'end) of the N2-specific sequence (26-nt) for the segment in hybridization with loop portion. The remaining 11-nt fragment was thereby used for the duplexes in connection with the assistant strand. In such the circumstance, the 26-nt N2-specific sequence, nevertheless, favorably folded in dimer (simulated by mfold, Figure S-5) in connection to a weak association with the assistant strand. This hampered facile construction of the four-way junction and inhibited the expedition of AND gate processing. A compromising approach to reduce the length (from 15- to 12-nt) in hybridization with loop enabling an extension (from 11- to 14-nt) of target/assistant strand duplex was thereby evolved. In addition, in light of the short duplex existed between N2 target and loop portion,

no space nucleotide was assigned to frank in the N2 side.

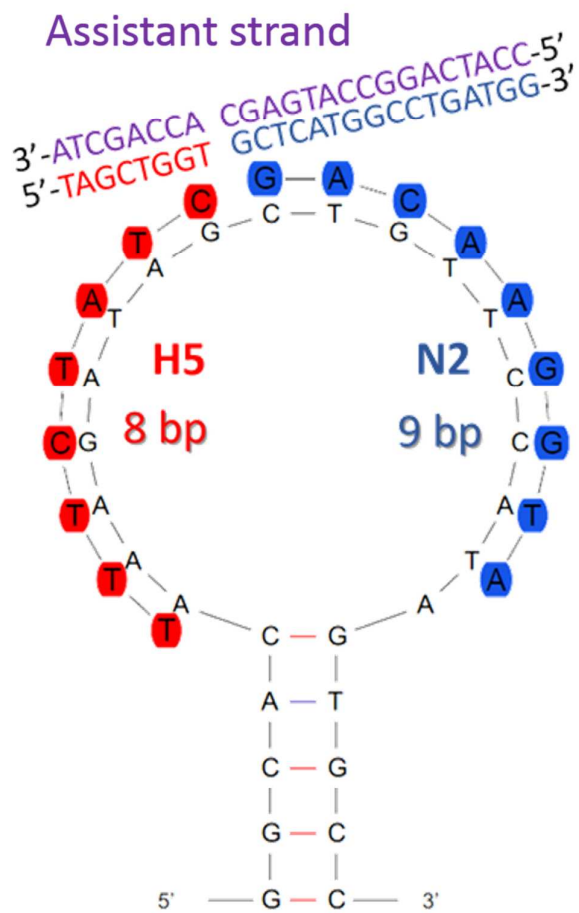

Figure S-3. Envisaged diagram depicting the associate bearing 8-nt fragment (residing in 3' end of the H5-specific sequence) and 9-nt (5' end in the N2-specific sequence) to hybridize with loop, as well as enable 8- and 16-nts, in H5 and N2, respectively, hybridizing to the arming probe.

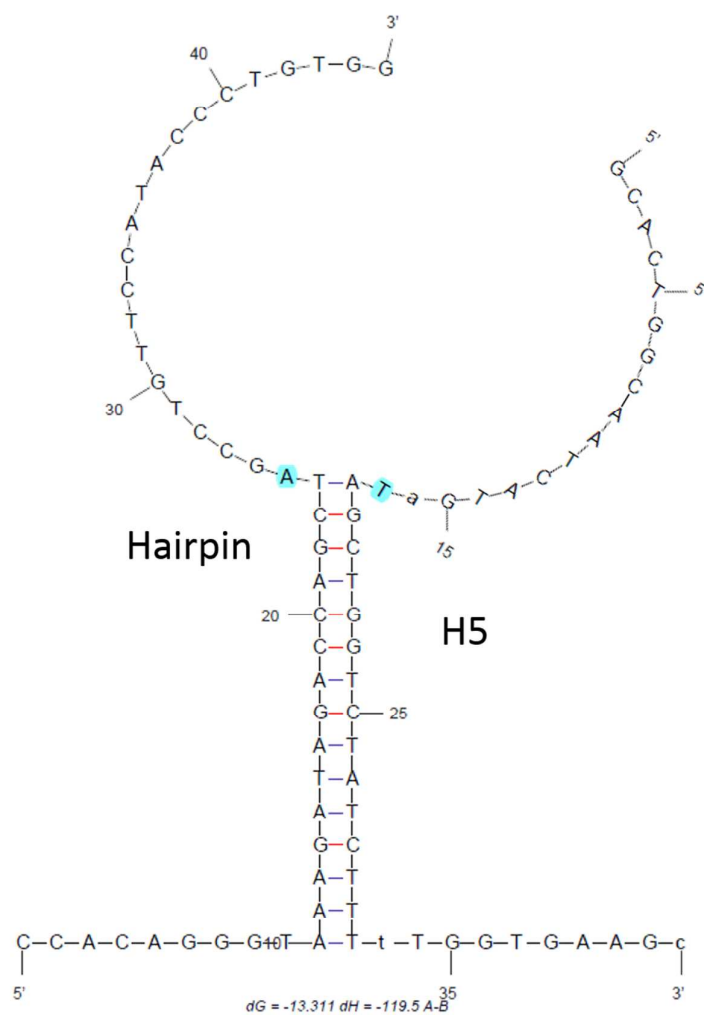

Figure S-4.Mfold simulated result showing that a deoxythymidylate residing at the 17th nt of H5-target (numbered from 5'end) de-hybridized with loop.

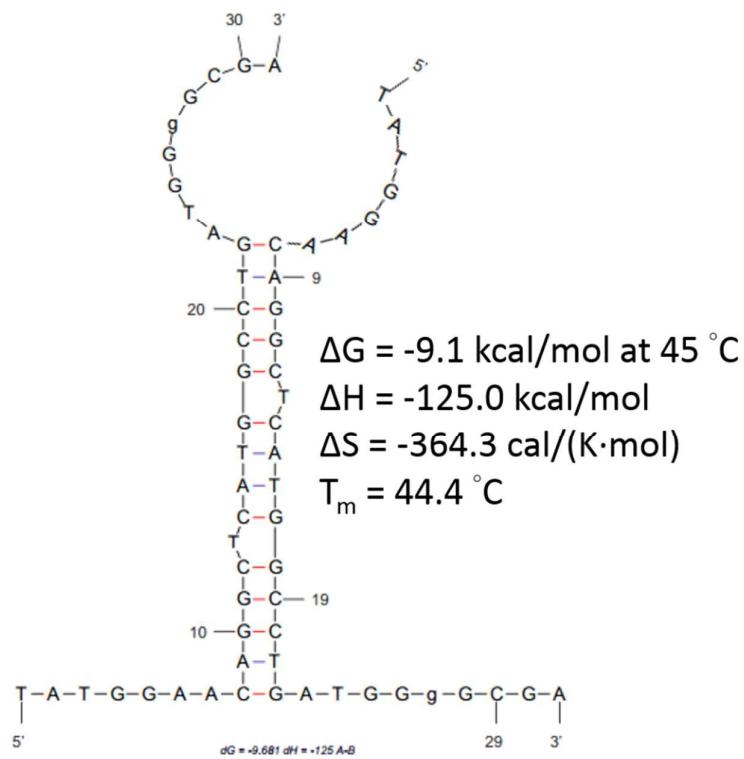

Figure S-5.Mfold simulated result depicting a dimer structure formed by the 26-nt N2-specific sequence.

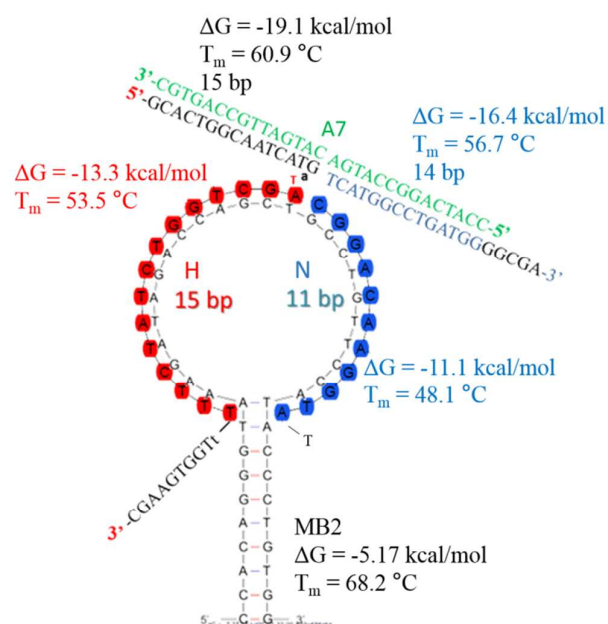

Figure S-6. Schematic configuration of the four-way junction composed of molecular beacon 2 (MB2), the assistant strand (A7), and specific sequences coded in H5 and N2 genes.

### Sequence selections of H5- and N2-specific genes

The constituent sequences of MBs were designed based on avian sequences acquired from the Influenza Virus Resource.<sup>2</sup> The downloaded influenza H5 and N2 nucleic sequences were respectively aligned by MUSCLE<sup>3</sup> for identification of contiguous conserved regions in the gene segments. The identified regions thus possessed more than 90% sequence conservation at each base in the whole population of the specified H5N2 subtype. These candidate regions were subsequently aligned to non-H5 and non-N2 subtypes separately with Bowtie<sup>4</sup> to eliminate the promiscuous sequences which can be observed in other subtypes. The selected candidate regions were further analyzed by performing BLAST analysis against Nucleotide collection to assess the sequence specificity of influenza virus.<sup>5</sup> Result snapshots generated through the selection process are detailed below. The resulted H5- and N2-specific sequences are summarized in Table S-2.

Table S-2. H5- and N2-specific sequences identified from the selection processes

| Numbered Position | Sequence (5'→3')            | Notes |
|-------------------|-----------------------------|-------|
| H5                |                             |       |
| 1613-1630         | TCA ACA GTG GCG AGT TCC     | 18-nt |
| 1650-1665         | TAG CTG GTC TAT CTT T       | 16-nt |
| N2                |                             |       |
| 932-948           | ATA AAT ATG GCA GAT TA      | 17-nt |
| 1004-1019         | GAT GAT AGC TCT AGC A       | 16-nt |
| 1202-1221         | CAA GTC ATA GTT GAC AAT AA  | 20-nt |
| 1376-1401         | TAT GGA ACA GGC TCA TGG CCT | 26-nt |
|                   | GAT GG                      |       |

### Flowchart of sequence selection:

1. Download HA/NA sequences of avian influenza HxN2/H5Nx viruses from Influenza

Virus: Resource (<http://www.ncbi.nlm.nih.gov/genomes/FLU/FLU.html>).



Protein or nucleotide sequences can be retrieved from the database using GenBank accession numbers or search terms. Multiple queries can be built by clicking the "Add Query" button every time a new query is made, and queries in any combination from the Query Builder can be selected to get sequences in the database. Sequences can be downloaded, and it is possible to analyze them using the multiple sequence alignment or tree building tool integrated to the database.

**Get sequences by accession**  
 Enter a comma or space separated list of sequence accessions or upload text file with this list.  
 Upload
 

選擇檔案

未選擇檔案

Accessions

Add query

Show results

**Select sequence type:**  
☒ Protein
 ☐ Protein coding region
 ☐ Nucleotide  
**Search for keyword:**  
 Keyword
 

Search in

strain name

**Define search set:**  

| Type | Host     | Country/Region     | Protein | Subtype | Sequence length                                                                        | Collection date   | Release date   |
|------|----------|--------------------|---------|---------|----------------------------------------------------------------------------------------|-------------------|----------------|
| any  | any      | any                | PB1-F2  | H 2     | Min.: <div></div>                                                                      | From: <div></div> |                |
| A    | Avian    | regions            | PA      | 3       | Max.: <div></div>                                                                      | To: <div></div>   |                |
| B    | Bat      | Northern temperate | PA-X    | 4       |                                                                                        | Year Month Day    | Year Month Day |
| C    | Blow fly | Southern temperate | HA      | 5       | <input type="checkbox"/> Full-length only<br><input type="checkbox"/> Full-length plus |                   |                |

**Additional filters:**
[show](#)  

Add query

Show results

☐ Collapse identical sequences

Clear form

|    |       |      |    |       |      |
|----|-------|------|----|-------|------|
| HA | H1N2  | 32   | NA | H5N1  | 2702 |
|    | H2N2  | 84   |    | H5N2  | 472  |
|    | H3N2  | 201  |    | H5N3  | 90   |
|    | H4N2  | 52   |    | H5N4  | 4    |
|    | H5N2  | 624  |    | H5N5  | 5    |
|    | H6N2  | 556  |    | H5N6  | 1    |
|    | H7N2  | 346  |    | H5N7  | 8    |
|    | H8N2  | 2    |    | H5N8  | 7    |
|    | H9N2  | 2465 |    | H5N9  | 14   |
|    | H10N2 | 12   |    | H5N10 | 0    |
|    | H11N2 | 68   |    |       |      |
|    | H12N2 | 3    |    |       |      |
|    | H13N2 | 14   |    |       |      |
|    | H14N2 | 0    |    |       |      |
|    | H15N2 | 1    |    |       |      |
|    | H16N2 | 0    |    |       |      |
|    | H17N2 | 0    |    |       |      |

## 2. Align HA/NA sequences of avian influenza H5N2 viruses to reference strains

(CY139327 and CY014851 for HA and NA sequence, respectively) using MUSCLE:

For example, the alignment of 642 H5 sequences is illustrated as the following:

```
>CY034681 A/chicken/Pennsylvania/3609/1993 1993// 4 (HA)
GGTCTAAACTATCAAAATGGAAAGATGGTGAATGGCCCTTGCATAATCAGCATTGTCAAAGGTGACCAAACTGTCATTGGTTATCATGCAAAACAATTCAACAGAGCAGGTTGACACAATCATGGAGAAGAATGTAACGGTCAACATGCTCA
>GU052787 A/chicken/Pennsylvania/21525/1983 1983// 4 (HA)
GGTATAATTATCAAAATGGAAAGACAGTGAATGGCCCTTGCATAATCAGCGTTGTCAAAGGTGACCAAACTGTCATTGGTTATCATGCAAAACAATTCAACAAAGCAAATGACACAATCATGGAAAAGAATGTGACGGTCAACATGCTCA
>EF607878 A/pheasant/MD/4457/1993 1993// 4 (HA)
-----ATGGAGAAGAATGTGACGGTCAACATGCTCA
>FJ520095 A/northern pintail/California/44221-789/2006 2006/10/05 4 (HA)
-----GTAGTGATTGCCCTGCAATAATCAGCATTGTCAAAGGTGACCGGATCTGCATTGGTTATCATGCAAAACAATTCAACAGAGCAAGTCGATACAATCATGGAGAAGAAGTGAACGGTCAACATGCTCA
>AF098537 A/turkey/Ramon/73 1973// 4 (HA)
-----CTTGTCAGAAGTGATCAGATTGTGCAATTGGTTACCATGCAAAACAATTCAACAGAGCAGGTTGACACAATCATGGAGAAGAATGTGACTGTCAACATGCCCA
>AB275425 A/chicken/Ibaraki/8/2005 2005// 4 (HA)
-----ATGAAAAGAATAGTAATTGGCTTTGCAATAATCAGCATTGTACAGGTGACCAAACTGTCATTGGTTATCATGCAAAACAATTCAACAAAACAAGTTGATACAATCATGGAAAAGAATGTGACGGTCAACATGCTCA
>AB507264 A/chicken/Taiwan/A703-1/2008 2008// 4 (HA)
--TACCATTATCAAAATGGAAAGAATAGTGATGGCTTTGCGATAGTCAGCATTGTCAAAGGTGACCGAATCTGCATTGGTTATCATGCAAAACAATTCAACAAAACAAGTTGACACAATCATGGAAAAGAATGTGACGGTCAACATGCTCA
>L46586 A/chicken/Puebla/8623-607/1994 1994// 4 (HA)
-----GCCTTTGCAATGATCAGCATCGTCAGGTGACCAAACTGTCATTGGTTATCATGCAAAACAATTCAACAAAACAAGTTGACACAATCATGGAGAAGAATGTGACGGTCAACATGCTCA
>CY017403 A/poultry/Italy/330/1997 1997// 4 (HA)
-----TCTGTCAAAATGGAGAAATAGTGCTTCTTCTTGAATAGTTAGTCTTGTAAAAAGTGACCAATTGTCATTGGTTACCATGCAAAACAATTCAACAGAGCAGGTTGACACAATCATGGAAAAGAATGTGACTGTCAACATGCCCA
>CY133809 A/gadwall/Missouri/10M00280/2010 2010/11/16 4 (HA)
GGTCCAAACTATAAAATGGAAAGAATAGTGATTGCCCTGCAATAATCAGCATTGTCAAAGGTGACCAAACTGTCATTGGTTATCATGCAAAACAATTCAACAGAGCAGGTTGATACAATCATGGAGAAGAATGTGACGGTCAACATGCCCA
>GU052612 A/chicken/Mexico/22184/1998 1998// 4 (HA)
-----GAGAAGAATGTGACGGTCAACATGCTCA
>GQ923373 A/waterfowl/Colorado/476466-2/2007 2007// 4 (HA)
GGTTCAAACCATGAAAATGGAAAGAATAGTGATTGCCCTGCAATAATCAGCATTGTCAAAGGTGACCAAACTGTCATTGGTTACCATGCAAAACAATTCAACAGAGCAGGTTGATACAATCATGGAAAAGAATGTGACGGTCAACATGCTCA
>AY296069 A/Avian/NY/31588-2/2000 2000// 4 (HA)
-----ATCTGCATTGGTTATCATGCAAAACAATTCAACAGAGCAGGTCGACACAATCATGGAGAAGAATGTGACGGTCAACATGCTCA
>AF164656 A/turkey/Virginia/40018/84 1984// 4 (HA)
-----GACCAAACTGTCATTGGTTATCATGCAAAACAATTCAACAAAGCAAATGACACAATCATGGAAAAGAATGTGACGGTCAACATGCTCA
>CY107847 A/chicken/Pennsylvania/1/1983 1983// 4 (HA)
-----ATGGAGAAGACAGTGATTGCCCTTGCATAATCAGCGTTGTCAAAGGTGACCAAACTGTCATTGGTTATCATGCAAAACAATTCAACAAAGCAAATGACACAATCATGGAAAAGAATGTGACGGTCAACATGCTCA
>U79450 A/mallard/OH/345/1988 1988// 4 (HA)
-----GACCAAACTGTCATTGGTTATCATGCAAAACAATTCAACAGAGCAGGTTGACACAATCATGGAGAAGAATGTGACGGTCAACATGCTCA
>GQ117169 A/duck/New York/466787/2006 2006// 4 (HA)
GGTCCAAACTATGAAAATGGAAAGAATAGTGATTGCCCTGCAATAATCAGCATTGTCAAAGGTGACCAAACTGTCATTGGTTACCATGCAAAACAATTCAACAGAGCAGGTTGATACAATCATGGAAAAGAATGTGACGGTCAACATGCTCA
>CY138312 A/blue-winged teal/New Brunswick/00288/2010 2010/09/14 4 (HA)
GGTCCAAACTATGAAAATGGAAAGAATAGTGATTGCCCTGCAATAATCAGCATTGTCAAAGGTGACCAAACTGTCATTGGTTACCATGCAAAACAATTCAACAGAGCAGGTTGATACAATCATGGAAAAGAATGTGACGGTCAACATGCTCA
>GU050144 A/gadwall/California/490899/2007 2007// 4 (HA)
GGTCCAAACTATAAAATGGAAAGAATAGTGATTGCCCTGCAATAATCAGCATTGTCAAAGGTGACCGGATCTGCATTGGTTATCATGCAAAACAATTCAACAGAGCAAGTCGATACAATCATGGAGAAGAAGTGAACGGTCAACATGCTCA
>FJ648285 A/mallard/Bavaria/1/2007 2007/09/15 4 (HA)
-----ATGGAGAAGATAGTACTTCTTTTTCAGTAGTCAGTCTTGTCAAAGGTGACCGATTGTCATTGGTTACCATGCAAAACAATTCAACAGAGCAGGTTGACACAATCATGGAAAAGAATGTGACTGTGACGATGCCCA
>CY014851 A/northern pintail/Missouri/452764/2006 2006// 4 (HA)
```

3. Calculate nucleotide frequency at each position: If the frequency > 0.9, the position is regarded as conserved in this subtype and shown as capitalized letter. Therefore, several contiguous conserved regions can be selected (as highlighted in red rectangles).

```

0 G:201 A:1 T:1 -:421
1 G:201 A:1 T:1 -:421
2 T:214 -:410
3 C:188 A:23 T:8 -:405
4 C:157 T:63 A:1 -:403
5 A:202 C:14 G:4 T:1 -:403
6 A:219 T:2 C:1 -:402
7 A:168 T:53 G:7 -:396
8 C:203 T:17 A:9 -:395
9 T:207 C:22 A:1 -:394
10 A:194 G:37 -:393
11 T:230 C:2 -:392
12 C:80 G:79 A:69 T:3 -:393
13 A:237 -:387
14 A:237 G:3 -:384
15 A:240 G:2 -:382
16 A:426 -:198
17 T:426 -:198
18 G:427 -:197
19 G:405 A:22 -:197
20 A:423 G:2 C:1 -:198
21 A:270 G:156 -:198
22 A:422 G:4 -:198
23 G:242 A:184 -:198
24 A:421 G:4 C:1 -:198
25 A:396 G:37 C:1 -:190
26 T:414 C:21 A:1 -:188
27 A:434 G:3 T:1 -:186
28 G:436 A:4 -:184
29 T:440 -:184
30 G:328 A:111 C:1 T:1 -:183

```

```

>Frequency_Seq
GGTccAAacTaT-AAAATGGAAgAATAGTgaTTgcccTtGCAATAaTCAGcaTtGTcAAAAGGTGACCaaATcTGCATTGGTTA-CATGCAAACAA-TCa
ACAgAgCagGTTGACACAATcATGGAAaAGAAATGTgACgGTcACaCATGcTcAgGAcATAcTgGAAaAagagCACAAATGGgAaaCTcTGCAGTcTtAAaG
GAGTgAagCCcCTCATtTcTGAaGGATTGcAGtGTAGCTGGaTGGCTtCTtGGAAAcCCaATGTGTGAtGAATTCCTgAATGTaCCgGAATGGTcATACAT
-GTgGAAaAaGAcAatCCAgTCAATGGCCtGTGcTATCCaGGAGAcTTCaacGAtTatGAAGAAcTGAAGCAttTaaTGAGcAGcACAAA-CATTTTGAG
AAAAATTCaATaaTcCctAGgAgTCTTGGTCCAAcATcATGCTCCTCATCAGGgGTGAGcTC-GCATGcCCaTAcAAaTGGTAgGTCtTcTTTTcAGgA
ATGTaGTgTGGTgTATCAAGAAgAAtAATGcgTACCcAACAaTAAAGAGGAccTAcAacAAcACcAatgtAGAAGAcCTTtTaaTA-TaTGGGGaATtCA
cCAcCCTAATGATGCaGCTGAaCAaAaAAcCTCTAcCAgAACTcgAaCACTTatGTgTcTGT-GGaACATCAACACTGAATCagAGaTCaaTcCCAgAA
ATAGCcACcAGaCCCaAaGTgAAcGGaCAaAGtGGAAGaATGGAAATTTTcTGGACAATAcTaAaGcGgAAcGATgCaATCa-cTtTgAGAGTAAaTGGgA
AtTTTATaGCTCCTGAATATGCaTACAAGATtTgTcAAgAAaGGagA-TCAGCAATCATGAAaAGTGAatTGGAGTatGGTAACTGtgAcaCcAAaTGTcA
gACcCCA-TgGGTGTcATAAAATTCcAGTaTGCC-TTcCACAATgT-CATCCTcTtACCATTGGgGAGTGCcCCAagTATGTcAAaTCggA-AaAcTgGTc
CTTGCaACaGgAcTAAgAAAcGTaCCcAAAAGgAAAcAAGAGGccTATTTGGaGCaATAGCaGGaTtCATAGAAGGAGGaTGGCAAGGaATGGT-GATG
G-TGGTATgGaTaACaTCATAGcAAATGAGCAGgGaaGTGGaTatGCTGCAGACAAAGaATcTAcCcAGaAAaGCAATcGATGGgATCACCcAATAaAGT-AA
CTCAATCATTGACAAAATGAACACTcCAaTTCGAaGcCGTTGGgAAaGAATTCaAcAAcCTaGAAAGgAGaATAGAAaATTTgAaTAAAGAAaATGGAAGAT
GGgTTTTtTaGATGTaTGGACTTAcAATGCaGAACCTTCT-GTgCTATGGAAaATGAaAGAACTcTgGAttTcCATGATTCAAATGTCAAGAACcTaTAcG
AtAAGGTcCGACTcCAGCTgAGaGAcAAATGCAAAaGAatTgGGcAAATGG-TGcTTtGaaTTCTAcCACAAGTGTGAcAaATGAATGcATGGAAGGTGTgAG
AAATGGAACgTATgAcTatCCgCAaTatTCAGAAGaATCAAGAcTgAAcAGaGAGGAATAgacGGAGTcAAATTgGAATCAATgGGcACcTatCagATA
cTaTCAATcTAcTCAACAGTGGCAGTTCCcTAGCACTGGCAATCATGaTAGCTGGTCTATCTTTtTGGATGTGcTCCAATGGaTCATTGCAgTGCAGaA
TTTGCATcTagaaTTGTGAGTTCAGATTaTaaTAAAAACACC

```

4. To identify HA/NA-specific sequence: the contiguous conserved regions were aligned to non-H5/N2 sequences using Bowtie and discarded the ones hitting to non-H5/N2 sequences.

```

3 Alignment_11.sam
Candidate_1 H10N2:1 H11N2:77 H12N2:3 H13N2:12 H1N2:22 H2N2:53 H3N2:117 H4N2:27 H6N2:547 H7N2:911 H8N2:5 H9N2:5208
Candidate_2 H10N2:6 H11N2:8 H12N2:3 H13N2:22 H15N2:1 H1N2:27 H2N2:99 H3N2:150 H4N2:72 H6N2:732 H7N2:32 H8N2:2 H9N2:5470
Candidate_3 H11N2:10 H1N2:8 H2N2:37 H3N2:361 H4N2:10 H6N2:2 H7N2:242 H8N2:2 H9N2:157
Candidate_4 H10N2:1 H11N2:93 H12N2:3 H13N2:16 H15N2:1 H1N2:39 H2N2:149 H3N2:6 H4N2:20 H6N2:813 H7N2:572 H8N2:4 H9N2:3577
Candidate_5 H10N2:8 H11N2:61 H12N2:4 H13N2:20 H15N2:2 H1N2:43 H2N2:142 H3N2:138 H4N2:101 H6N2:856 H7N2:471 H8N2:2 H9N2:132
Candidate_6 H10N2:37 H11N2:90 H13N2:12 H15N2:1 H1N2:35 H2N2:163 H3N2:78 H4N2:42 H6N2:117 H7N2:332 H8N2:2 H9N2:1975
Candidate_7 H10N2:13 H11N2:70 H12N2:8 H13N2:10 H15N2:3 H1N2:28 H2N2:68 H3N2:231 H4N2:62 H6N2:322 H7N2:104 H8N2:2 H9N2:1647
3 Alignment_13.sam
Candidate_1 H15N2:1 H1N2:2 H3N2:148 H4N2:11 H6N2:127 H8N2:2
Candidate_2 H1N2:2 H2N2:161 H3N2:7 H7N2:2 H8N2:2 H9N2:12
3 Alignment_14.sam
Candidate_1 H2N2:55 H3N2:53 H6N2:146 H7N2:5 H9N2:23
Candidate_2 H11N2:67 H13N2:14 H2N2:79 H4N2:20 H6N2:293 H9N2:626
3 Alignment_15.sam
Candidate_1 H1N2:2 H2N2:30 H6N2:152 H8N2:2
3 Alignment_16.sam
-
3 Alignment_17.sam
Candidate_1 H2N2:8
Candidate_2 H2N2:70
3 Alignment_18.sam
-
3 Alignment_26.sam
Candidate_1 H1N2:3 H6N2:117

```

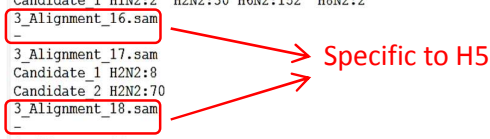

Specific to H5

## REFERENCES

- (1) Hoffmann, E.; Stech, J.; Guan, Y.; Webster, R. G.; Perez, D. R. *Arch. Virol.* **2001**, *146*, 2275-2289.
- (2) Bao, Y. M.; Bolotov, P.; Dernovoy, D.; Kiryutin, B.; Zaslavsky, L.; Tatusova, T.; Ostell, J.; Lipman, D. J. *J. Virol.* **2008**, *82*, 596-601.
- (3) Edgar, R. C. *Nucleic Acids Res.* **2004**, *32*, 1792-1797.
- (4) Langmead, B.; Trapnell, C.; Pop, M.; Salzberg, S. L. *Genome Biol.* **2009**, *10*.
- (5) Johnson, M.; Zaretskaya, I.; Raytselis, Y.; Merezhuk, Y.; McGinnis, S.; Madden, T. L. *Nucleic Acids Res.* **2008**, *36*, W5-W9.
